# Supplementary material
Source: PubMed Central journal article supplement (PMC6442026)
Supplement: supp_RA118.006316_141386_2_supp_280143_pmtty0.pdf [file supp_RA118.006316_141386_2_supp_280143_pmtty0.pdf]

Supporting Information for

**The interplay of the metallosensor CueR with two distinct CopZ chaperones defines copper homeostasis in *Pseudomonas aeruginosa***

Lorena Novoa-Aponte, David Ramírez, and José M. Argüello\*

From the Department of Chemistry and Biochemistry, Worcester Polytechnic Institute, 60 Prescott St, Worcester, Massachusetts, 01605, United States of America

Running title: Cytoplasmic Cu<sup>+</sup> distribution in *P. aeruginosa*

\*To whom correspondence should be addressed: Dr. José M. Argüello, Department of Chemistry and Biochemistry, Worcester Polytechnic Institute, 60 Prescott St, Worcester, Massachusetts, 01605, United States of America. Phone: (508) 330-5169, e-mail: [arguello@wpi.edu](mailto:arguello@wpi.edu)

**This PDF file includes:**

Figures S1 to S6

Tables S1 to S3

References for SI citations

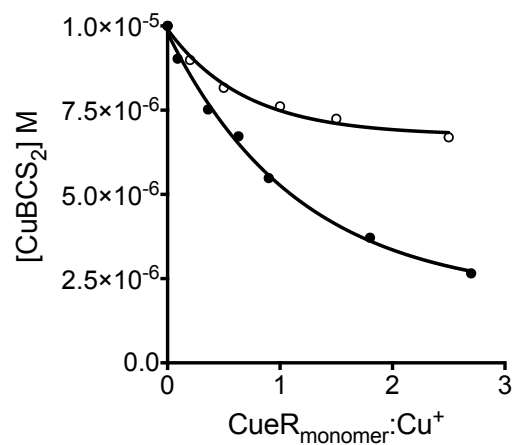

**Fig. S1.** CueR-Cu<sup>+</sup> dissociation constant  $K_D$  determined using a BCS competition assay (2). Reaction mixtures were prepared in buffer H with constant concentrations of Cu<sup>+</sup> (10 μM) and BCS (25 or 100 μM) and varying concentrations of CueR (1-30 μM monomer). After 10 min equilibration, CuBCS<sub>2</sub> concentrations were estimated using  $A_{483}$  ( $\beta_2$  10<sup>19.8</sup> M<sup>-2</sup>,  $\epsilon_{483}$  13000 M<sup>-1</sup>cm<sup>-1</sup>). CueR-Cu<sup>+</sup>  $K_D$  was calculated by fitting the experimental data to the equilibrium binding equation (2,3). As CueR dimers bind two Cu<sup>+</sup> (4,5),  $[P]_{\text{total}} = [\text{CueR monomer}]$ .  $K_D$  values determined using 25 μM CuBCS<sub>2</sub> (black circles) and 100 μM CuBCS<sub>2</sub> (open circles) were curve fitted to  $K_D = 3.1 \pm 0.2 \times 10^{-16}$  M and  $K_D = 7.9 \pm 0.9 \times 10^{-17}$  M, respectively. An average  $K_D = 2.5 \pm 1.0 \times 10^{-16}$  M was calculated based on 6 independent experiments.

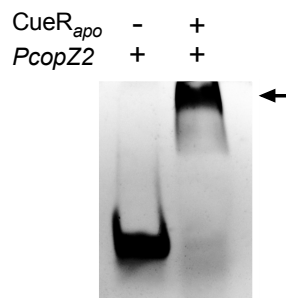

**Fig. S2.** Interaction CueR<sub>apo</sub>-*PcopZ2* examined by Electrophoretic Mobility Shift Assay. 10 pmol of 50-bp unlabeled *PcopZ2* (Table S1) were incubated 30 min at room temperature with 500 pmol CueR dimer in 10 mM Tris (pH 7.5), 100 mM NaCl, 1 mM EDTA, 0.1 mM DTT, 5% glycerol, 0.01 mg/mL BSA. The electrophoretic mobility of *PcopZ2* in the absence (left) and the presence of CueR<sub>apo</sub> (right), was observed in 10% polyacrylamide/TAE gels stained with ethidium bromide. The arrow highlights the mobility shift of *PcopZ2* in the presence of CueR.

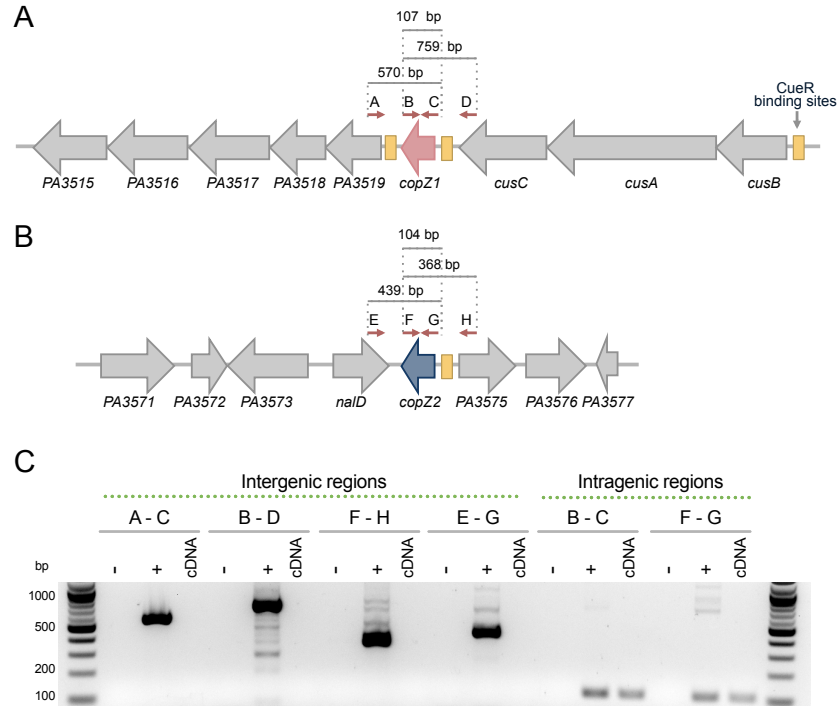

**Fig. S3.** *P. aeruginosa* *copZ1* and *copZ2* operon mapping. Total RNA from *P. aeruginosa* PAO1 in exponential growth phase was reverse transcribed and the cDNA used as template for PCR. Primers were designed in order to amplify the junctions between adjacent genes. Primers in intragenic regions were included as controls (Table S1). Schematic representation of the position of primers designed for co-transcription analysis of the gene cluster of (A) *copZ1* and (B) *copZ2* operons. (C) Each panel is constituted by three lanes: negative control, H<sub>2</sub>O; gDNA lane, which contains amplified products from genomic DNA and serves as positive control; and the cDNA lane, that contains the RT-PCR products.

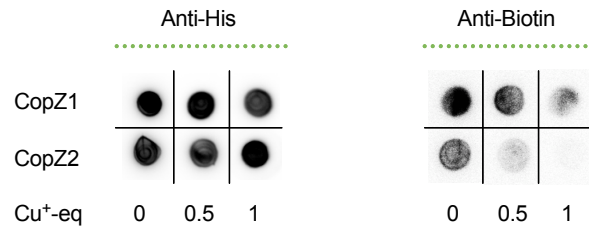

**Fig. S4.**  $\text{Cu}^+$  protection of Cys residues at the metal binding sites from biotin-maleimide alkylation. Pure extracts of His-tagged CopZ1 and CopZ2 were separately alkylated with biotin-maleimide in the presence of 0, 0.5, and 1 eq of  $\text{Cu}^+$ . After removing excess of alkylating agent by Ni-NTA affinity chromatography, proteins were dot-blotted and immune stained either with anti-His antibodies or anti-Biotin antibodies. The dividing lines indicate where the images have been spliced; signals were from an identical original image and have not been altered. A decrease in anti-biotin staining indicated that  $\text{Cu}^+$  protects Cys against chemical modification.

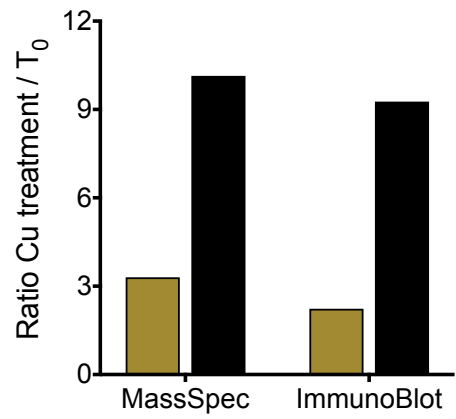

**Fig. S5.** Levels of CopZ1 (ochre) and CopZ2 (black) in the presence of 0.5 mM CuSO<sub>4</sub> (10 min) relative to those in the absence of metal, determined by MS/MS and immunostaining. Relative ratios in MS/MS were generated by spectral counts (total spectra). In both approaches, samples were normalized prior to the experiment (equal cell counts).

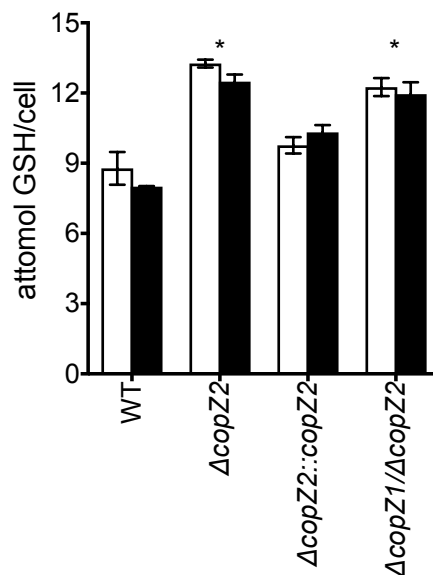

**Fig. S6.** Levels of GSH in WT,  $\Delta copZ2$ ,  $\Delta copZ1/\Delta copZ2$  mutant strains and *copZ2* complemented strain upon 0.5 mM  $CuSO_4$  treatment (10 min). The amounts of total GSH in the absence (white) and the presence of copper (black) were measured spectrophotometrically using a kinetic assay of DNTB reduction coupled to GSSG recycling. Cells were incubated in 0.5 mM  $CuSO_4$  in antibiotic-free LB medium. 2 mL aliquots were taken before and after 10 min of  $CuSO_4$  addition, harvested by centrifugation, resuspended in 150  $\mu$ L 5% sulfosalicylic acid, sonicated 30 sec in a dry-ice/ethanol bath, and incubated for 10 min on ice. Cellular debris and proteins were removed by centrifugation at 10,000 rpm for 10 min, and supernatants used for total GSH quantification. 20  $\mu$ L samples were pre-incubated 5 min with 78  $\mu$ M DTNB, 0.115 units/mL GSH reductase, 100 mM  $Na_2HPO_4/Na_2HPO_4$  (pH 7), 1 mM EDTA. Upon addition of 46  $\mu$ M NADPH, A412 was measured at 1 min intervals for 7 minutes. 0-200  $\mu$ M GSH in 5% sulfosalicylic acid were used as standards. Data are the mean  $\pm$  SE of three independent experiments. Significant differences from the WT as determined by paired two-tailed Student's t-test are \* $P < 0.05$ .

**Table S1. Bacterial strains, plasmids and primers used in this study**

| Strains                       | Relevant features                                                                                                                                                                                                                                         | Reference  |
|-------------------------------|-----------------------------------------------------------------------------------------------------------------------------------------------------------------------------------------------------------------------------------------------------------|------------|
| <i>Pseudomonas aeruginosa</i> |                                                                                                                                                                                                                                                           |            |
| PAO1                          | Wild type                                                                                                                                                                                                                                                 | (6)        |
| $\Delta copZ1$                | <i>copZ1</i> gene replaced by a <i>Bam</i> HI site                                                                                                                                                                                                        | (7)        |
| $\Delta copZ1::copZ1$         | <i>copZ1</i> complemented gene, C-terminal TEV_His-tag, under endogenous promoter, Gm <sup>R</sup>                                                                                                                                                        | This study |
| $\Delta copZ2$                | <i>copZ2</i> gene interrupted by a <i>Pvu</i> II site and a stop codon                                                                                                                                                                                    | This study |
| $\Delta copZ2::copZ2$         | <i>copZ2</i> complemented gene, C-terminal TEV_His-tag, under endogenous promoter, Gm <sup>R</sup>                                                                                                                                                        | This study |
| $\Delta copZ1/\Delta copZ2$   | <i>copZ2</i> gene interrupted by a <i>Pvu</i> II site and a stop codon in the $\Delta copZ1$ background                                                                                                                                                   | This study |
| $\Delta copA1$                | PW7626, <i>copA1</i> (PA3920)::ISphoA::Tet <sup>R</sup>                                                                                                                                                                                                   | (8)        |
| $\Delta cueR$                 | PW9026, <i>cueR</i> (PA4778)-B07::ISphoA/hah::Tet <sup>R</sup>                                                                                                                                                                                            | (8)        |
| <i>Escherichia coli</i>       |                                                                                                                                                                                                                                                           |            |
| BL21(DE3)                     | <i>F<sup>-</sup> ompT gal dcm lon hsdS<sub>B</sub>(r<sub>B</sub><sup>-</sup>m<sub>B</sub><sup>-</sup>) <math>\lambda</math>(DE3 [<i>lacI lacUV5-T7p07 ind1 sam7 nin5</i>] [<i>malB<sup>+</sup></i>]<sub>K-12</sub>(<math>\lambda</math><sup>S</sup>))</i> | Novagen    |
| BL21(DE3)pLysS                | BL21(DE3) strain <i>pLysS</i> [ <i>T7p20 ori<sub>p15A</sub></i> ]( <i>Cm<sup>R</sup></i> )                                                                                                                                                                | Novagen    |
| Top10                         | <i>F<sup>-</sup> mcrA <math>\Phi</math>80lacZ<math>\Delta</math>M15 <math>\Delta</math>lacX74 recA1 araD139 <math>\Delta</math>(ara-leu)7697 galU galK rpsL (Str<sup>R</sup>) endA1 nupG</i>                                                              | Invitrogen |
| S17.1                         | <i>Tp<sup>R</sup> Sm<sup>R</sup> recA, thi, pro, hsdR<sup>+</sup> M<sup>+</sup> RP4- 2</i><br><i>Tc:Mu::Kan::Tn7/<math>\lambda</math>pir.</i>                                                                                                             | (9)        |
| Plasmids                      | Relevant features                                                                                                                                                                                                                                         | Reference  |
| pET-30b+                      | T7 promoter, <i>lac</i> operator, 6xHis tag, <i>lacI</i> , Kan <sup>R</sup>                                                                                                                                                                               | Novagen    |
| <i>copZ1::pET-30b+</i>        | <i>PA3520::pET-30b+</i> , Kan <sup>R</sup>                                                                                                                                                                                                                | (2)        |
| <i>copZ2::pET-30b+</i>        | <i>PA3574.1::pET-30b+</i> , Kan <sup>R</sup>                                                                                                                                                                                                              | (2)        |
| pBADtopo                      | <i>araBAD</i> promoter, V5 epitope tag, 6xHis tag, Amp <sup>R</sup>                                                                                                                                                                                       | Invitrogen |
| <i>cueR</i> strep::pBAD       | <i>PA4778_strep::pBAD</i> , Amp <sup>R</sup>                                                                                                                                                                                                              | This study |
| pDONRPEX18Gm                  | Gateway allelic exchange vector, Gm <sup>R</sup>                                                                                                                                                                                                          | (10)       |
| pUC18-mini-Tn7-Gm             | Suicide delivery vector, Gm <sup>R</sup>                                                                                                                                                                                                                  | (11)       |
| pTNS2                         | Helper plasmid ( <i>TnsABCD</i> site), Amp <sup>R</sup>                                                                                                                                                                                                   | (12)       |
| Primers                       | Sequence (5'-3')                                                                                                                                                                                                                                          |            |
| <i>copZ2</i> mutant           |                                                                                                                                                                                                                                                           |            |
| CopZ2upF-GWB1                 | ggggacaagttgtacaaaaagcaggctacatcagcaccgctacagcag                                                                                                                                                                                                          |            |
| CopZ2upR01                    | cagctgtcagcgctggccggcgctcatccctgaaccttgaaa                                                                                                                                                                                                                |            |
| CopZ2downF01                  | gcccggccagcctgacagctggtacggcgatcacccatgc                                                                                                                                                                                                                  |            |
| CopZ2downR-GWB2               | ggggaccactttgtacaagaagctgggtagcggctgctactggcacttc                                                                                                                                                                                                         |            |
| Mutant complementation        |                                                                                                                                                                                                                                                           |            |
| Comp_CopZ1_F                  | ttttactagtctggcgggatacctcgtc                                                                                                                                                                                                                              |            |
| Comp_CopZ1_R                  | ttttggtacctcaatgatgatgatgatgggactgaaaatacaggtttcggcgtgctacggccctccggataaccgg                                                                                                                                                                              |            |
| Comp_CopZ2_F                  | ttttactagtccgatgacatcagcaccg                                                                                                                                                                                                                              |            |
| Comp_CopZ2_R                  | ttttggtacctcaatgatgatgatgatgggactgaaaatacaggtttcggcgtgctgcccagctcggcggcgtg                                                                                                                                                                                |            |
| <i>copZ2</i> promoter         |                                                                                                                                                                                                                                                           |            |
| <i>copZ2</i> prom_F           | tatttcgaggattgacctgacaccatgtcaaggtcgaaaatcgcccat                                                                                                                                                                                                          |            |
| <i>copZ2</i> prom_R           | atggggcgattttcggcctgacatggtgtcaaggtcaatcctcgaata                                                                                                                                                                                                          |            |
| Operon mapping                |                                                                                                                                                                                                                                                           |            |
| OW_PA3519_to_copZ1 (A)        | tgtaacggattgaagtcat                                                                                                                                                                                                                                       |            |
| OW_PA3521_to_copZ1 (D)        | agcgcgacagtcgctcctga                                                                                                                                                                                                                                      |            |
| OW_PA3575_to_copZ2 (H)        | gaatagcggcgatggacat                                                                                                                                                                                                                                       |            |
| OW_PA3574_to_copZ2 (E)        | gcccgcatectgacctcc                                                                                                                                                                                                                                        |            |
| qPCR                          |                                                                                                                                                                                                                                                           |            |
| qPA4268F                      | gcaaaactgcccgaacgtc                                                                                                                                                                                                                                       |            |
| qPA4268R                      | tacacgaccgccacggatca                                                                                                                                                                                                                                      |            |
| qCopZ1F (C)                   | aagactgtcaccgtatcct                                                                                                                                                                                                                                       |            |
| qCopZ1R (B)                   | aatgcgtgcttgcaga                                                                                                                                                                                                                                          |            |
| qCopZ2F (G)                   | ggtgcaggcgaaggatt                                                                                                                                                                                                                                         |            |
| qCopZ2R (F)                   | ggatcgctcgagtacct                                                                                                                                                                                                                                         |            |
| qCopA1F                       | gaaacgggtgctggcgaagat                                                                                                                                                                                                                                     |            |
| qCopA1R                       | ttaaccaggcctgctccag                                                                                                                                                                                                                                       |            |



**Table S2. Docking studies of CopZ1 and CopZ2 with CueR.**

| <b>CueR<sub>holo</sub> – CopZ1</b>      |      |                |             |            |                      |                    |          |
|-----------------------------------------|------|----------------|-------------|------------|----------------------|--------------------|----------|
| <b>Cluster</b>                          |      | <b>HADDOCK</b> | <b>RMSD</b> | <b>vdW</b> | <b>Electrostatic</b> | <b>Desolvation</b> | <b>Z</b> |
| No.                                     | Size | a.u.           | Å           | kcal/mol   | kcal/mol             | kcal/mol           |          |
| 1                                       | 56   | -82 ± 1        | 3.9 ± 0.2   | -29 ± 2    | -324 ± 8             | 12 ± 2             | -2.0     |
| 2                                       | 41   | -71 ± 3        | 2.0 ± 0.1   | -37 ± 4    | -195 ± 59            | 4 ± 10             | -1.0     |
| 3                                       | 20   | -61 ± 2        | 2.6 ± 0.2   | -28 ± 3    | -179 ± 34            | 3 ± 8              | -0.1     |
| 4                                       | 16   | -62 ± 2        | 3.6 ± 1.1   | -27 ± 5    | -231 ± 30            | 11 ± 3             | -0.2     |
| 5                                       | 15   | -47 ± 1        | 7.1 ± 0.5   | -28 ± 5    | -132 ± 18            | 7 ± 6              | 1.1      |
| 6                                       | 8    | -49 ± 7        | 5.3 ± 0.1   | -38 ± 5    | -96 ± 19             | 7 ± 3              | 1.0      |
| 7                                       | 5    | -45 ± 5        | 6.2 ± 0.5   | -28 ± 4    | -106 ± 23            | 4 ± 4              | 1.3      |
| 8                                       | 5    | -58 ± 15       | 1.1 ± 0.7   | -34 ± 4    | -179 ± 43            | 12 ± 8             | 0.1      |
| 9                                       | 4    | -63 ± 4        | 4.8 ± 0.2   | -27 ± 5    | -268 ± 34            | 11 ± 7             | -0.3     |
| Average cluster size ± SD = 18.9 ± 18.1 |      |                |             |            |                      |                    |          |
| <b>CueR<sub>holo</sub> – CopZ2</b>      |      |                |             |            |                      |                    |          |
| <b>Cluster</b>                          |      | <b>HADDOCK</b> | <b>RMSD</b> | <b>vdW</b> | <b>Electrostatic</b> | <b>Desolvation</b> | <b>Z</b> |
| No.                                     | Size | a.u.           | Å           | kcal/mol   | kcal/mol             | kcal/mol           |          |
| 10                                      | 113  | -73 ± 1        | 7.4 ± 0.1   | -32 ± 7    | -183 ± 22            | -5 ± 4             | -1.4     |
| 11                                      | 14   | -71 ± 6        | 0.1 ± 0.3   | -34 ± 4    | -242 ± 70            | 9 ± 8              | -1.2     |
| 12                                      | 13   | -53 ± 5        | 5.7 ± 0.1   | -29 ± 4    | -81 ± 24             | -8 ± 5             | 0.5      |
| 13                                      | 13   | -54 ± 3        | 8.6 ± 0.1   | -30 ± 4    | -152 ± 25            | 6 ± 7              | 0.5      |
| 14                                      | 9    | -45 ± 2        | 4.3 ± 0.1   | -35 ± 3    | -44 ± 10             | -1 ± 5             | 1.3      |
| 15                                      | 6    | -65 ± 11       | 6.5 ± 0.1   | -35 ± 2    | -215 ± 30            | 10 ± 6             | -0.6     |
| 16                                      | 6    | -49 ± 8        | 6.0 ± 0.1   | -26 ± 3    | -186 ± 28            | 12 ± 4             | 0.9      |
| Average cluster size ± SD = 24.9 ± 39.0 |      |                |             |            |                      |                    |          |

**HADDOCK**: HADDOCK score in a.u. (arbitrary units); **RMSD**: Root-mean-square deviation from the overall lowest-energy structure; **vdW**: van der Waals; **Z**: Z-Score indicates how many SD from the average the cluster is located in terms of score (negative values indicate stronger simulation). Significant conformational clusters are highlighted in grey.

**Table S3. Interacting residues of CopZ1 and CopZ2 with CueR**

| <b>CueR<sub>holo</sub> – CopZ1</b> |              |       |                     |              |       |
|------------------------------------|--------------|-------|---------------------|--------------|-------|
| <b>Hydrogen bond</b>               |              |       | <b>Salt bridges</b> |              |       |
| CueR                               | Distance (Å) | CopZ1 | CueR                | Distance (Å) | CopZ1 |
| Asp107                             | 1.7          | Lys16 | Asp107              | 2.6          | Lys16 |
| Glu110                             | 1.7          | Lys16 | Glu110              | 4.0          | Lys16 |
| His111                             | 2.0          | Thr17 | Glu110              | 2.7          | Lys16 |
| Gln113                             | 2.2          | Cys11 | Asp125              | 2.8          | Arg20 |
| Gln113                             | 2.2          | Cys14 | Asp125              | 3.6          | Arg20 |
| Arg117                             | 2.0          | Tyr60 | Asp125              | 3.0          | Arg20 |
| Lys124                             | 1.7          | Glu57 | Asp125              | 3.4          | Arg20 |
| Asp125                             | 1.9          | Arg20 |                     |              |       |
| Asp125                             | 2.2          | Arg20 |                     |              |       |
| Cys131                             | 3.0          | Glu57 |                     |              |       |

  

| <b>CueR<sub>holo</sub> – CopZ2</b> |              |       |                     |              |       |
|------------------------------------|--------------|-------|---------------------|--------------|-------|
| <b>Hydrogen bond</b>               |              |       | <b>Salt bridges</b> |              |       |
| CueR                               | Distance (Å) | CopZ2 | CueR                | Distance (Å) | CopZ2 |
| Glu110                             | 2.2          | Cys11 | Lys124              | 3.8          | Glu58 |
| Arg117                             | 2.1          | Gly8  | Lys124              | 2.6          | Glu58 |
| Arg117                             | 2.4          | Thr10 |                     |              |       |
| Arg117                             | 1.8          | Thr10 |                     |              |       |
| Asp119                             | 1.7          | Tyr60 |                     |              |       |
| Lys124                             | 1.6          | Glu58 |                     |              |       |
| Cys131                             | 1.7          | Glu58 |                     |              |       |

## References

1. Letunic, I., and Bork, P. (2006) Interactive Tree Of Life (iTOL): an online tool for phylogenetic tree display and annotation. *Bioinformatics* **23**, 127-128
2. Quintana, J., Novoa-Aponte, L., and Argüello, J. M. (2017) Copper homeostasis networks in the bacterium *Pseudomonas aeruginosa*. *J. Biol. Chem.* **292**, 15691-15704
3. Xiao, Z., Brose, J., Schimo, S., Ackland, S. M., La Fontaine, S., and Wedd, A. G. (2011) Unification of the copper(I) binding affinities of the metallo-chaperones Atx1, Atox1, and related proteins: detection probes and affinity standards. *J. Biol. Chem.* **286**, 11047-11055
4. Changela, A., Chen, K., Xue, Y., Holschen, J., Outten, C. E., O'Halloran, T. V., and Mondragon, A. (2003) Molecular basis of metal-ion selectivity and zeptomolar sensitivity by CueR. *Science* **301**, 1383-1387
5. Philips, S. J., Canalizo-Hernandez, M., Yildirim, I., Schatz, G. C., Mondragon, A., and O'Halloran, T. V. (2015) Allosteric transcriptional regulation via changes in the overall topology of the core promoter. *Science* **349**, 877-881
6. Winsor, G. L., Griffiths, E. J., Lo, R., Dhillon, B. K., Shay, J. A., and Brinkman, F. S. (2015) Enhanced annotations and features for comparing thousands of *Pseudomonas* genomes in the *Pseudomonas* genome database. *Nucleic Acids Res.* **44**, D646-D653
7. Thaden, J. T., Lory, S., and Gardner, T. S. (2010) Quorum-sensing regulation of a copper toxicity system in *Pseudomonas aeruginosa*. *J. Bacteriol.* **192**, 2557-2568
8. Jacobs, M. A., Alwood, A., Thaipisuttikul, I., Spencer, D., Haugen, E., Ernst, S., Will, O., Kaul, R., Raymond, C., Levy, R., Chun-Rong, L., Guenther, D., Bovee, D., Olson, M. V., and Manoil, C. (2003) Comprehensive transposon mutant library of *Pseudomonas aeruginosa*. *Proc. Nat. Acad. Sci. USA* **100**, 14339-14344
9. Simon, R., Priefer, U., and Puhler, A. (1983) A broad host range mobilization system for *In vivo* genetic-engineering-transposon mutagenesis in gram-negative bacteria. *Nat. Biotechnol.* **1**, 784-791
10. Hmelo, L. R., Borlee, B. R., Almblad, H., Love, M. E., Randall, T. E., Tseng, B. S., Lin, C., Irie, Y., Storek, K. M., and Yang, J. J. (2015) Precision-engineering the *Pseudomonas aeruginosa* genome with two-step allelic exchange. *Nat. Protoc.* **10**, 1820
11. Choi, K. H., and Schweizer, H. P. (2006) mini-Tn7 insertion in bacteria with single *attTn7* sites: example *Pseudomonas aeruginosa*. *Nat. Protoc.* **1**, 153-161
12. Choi, K.-H., Gaynor, J. B., White, K. G., Lopez, C., Bosio, C. M., Karkhoff-Schweizer, R. R., and Schweizer, H. P. (2005) A Tn7-based broad-range bacterial cloning and expression system. *Nat. methods* **2**, 443
